# Supplementary material for: A ‘phenotypic hangover’: the predictive adaptive response and multigenerational effects of altered nutrition on the transcriptome of Drosophila melanogaster
Source: PubMed Central journal article supplement — Environ Epigenet. 2017 Dec 5;3(4):dvx019. doi: 10.1093/eep/dvx019 (PMC5804559; doi:10.1093/eep/dvx019), 2017-12-05
Supplement: dvx019_supp_file_4.pdf [file dvx019_supp_file_4.pdf]

| RNAseq       | LPHC      | LPHC           | LPHC      | LPHC            | HPLC      | HPLC            | HPLC      | HPLC            | F1(M)     | F1(M)             | F1(MM)    | F1(MM)             | F2(M)     | F2(M)              | F2(MM)     | F2(MM)            | F3(M)     | F3(M)             | F3(M)     | F3(M)            | F3(MM)    | F3(MM)           | F3(MM)     | F3(MM)          |
|--------------|-----------|----------------|-----------|-----------------|-----------|-----------------|-----------|-----------------|-----------|-------------------|-----------|--------------------|-----------|--------------------|------------|-------------------|-----------|-------------------|-----------|------------------|-----------|------------------|------------|-----------------|
| Caf1-105     | 3,111.00  | 540.62         | 3,383.00  | 705.95          | 7,994.00  | 1461.23         | 5,603.00  | 1225.2          | 7,480.00  | 1581.19           | 3,551.00  | 730.46             | 6,214.00  | 1534.62            | 4,198.00   | 968.58            | 7,190.00  | 1534.47           | 6,408.00  | 1347.14          | 2,248.00  | 453.98           | 2,285.00   | 527.19          |
| Def          | 0         | 1183.41        | 0         | 1059.6          | 0         | 337.92          | 0         | 739.36          | 0         | 850.04            | 0         | 561.43             | 0         | 2295.78            | 0          | 1928.06           | 0         | 2151.62           | 0         | 2836.26          | 0         | 654.76           | 0          | 640.37          |
| E(Pc)        | 9,543.00  | 1252.99        | 10,639.00 | 1553.81         | 21,109.00 | 2590.59         | 16,304.00 | 2362.66         | 20,780.00 | 2768.44           | 13,052.00 | 1783.37            | 16,793.00 | 2941.93            | 4,621.00   | 1881.6            | 20,280.00 | 2666.68           | 16,811.00 | 2472.8           | 9,090.00  | 1248.64          | 6,101.00   | 1101.56         |
| E(bx)        | 14,158.00 | 1715.39        | 15,712.00 | 2122.34         | 28,571.00 | 3247.3          | 21,570.00 | 3071.66         | 30,496.00 | 3593.59           | 17,028.00 | 2316.29            | 20,994.00 | 2991.87            | 6,909.00   | 2357.3            | 27,586.00 | 3612.36           | 24,255.00 | 3145.61          | 14,086.00 | 1554.03          | 9,194.00   | 1503.62         |
| E(spl)m4-BFM | 56        | 28.78          | 0         | 4.03            | 0         | 2.65            | 0         | 2.3             | 0         | 1.38              | 0         | 2.66               | 0         | 3.22               | 0          | 1                 | 0         | 3.2               | 6         | 7.41             | 20        | 4.87             | 228        | 94.72           |
| E(spl)m5-HLH | 49        | 9.55           | 0         | 2.24            | 2         | 1               | 0         | 2.3             | 2         | 1                 | 0         | 1                  | 2         | 1.51               | 0          | 1.01              | 0         | 4.13              | 0         | 1.18             | 23        | 2.75             | 147        | 55.02           |
| Fbp1         | 40        | 1.31           | 31        | 4.03            | 618       | 33.76           | 3,039.00  | 180.83          | 1,742.00  | 479.24            | 248       | 12.6               | 470       | 44.08              | 227        | 16.17             | 3,515.00  | 264.91            | 2,479.00  | 177.96           | 23        | 1.7              | 36         | 4.34            |
| Hml          | 9,024.00  | 1121.14        | 8,296.00  | 1060.5          | 2,407.00  | 271.38          | 2,921.00  | 410.36          | 2,596.00  | 303.42            | 7,303.00  | 976.04             | 2,799.00  | 407.26             | 3,474.00   | 859.5             | 1,312.00  | 198.09            | 2,333.00  | 343.81           | 7,371.00  | 809.04           | 3,762.00   | 701.19          |
| Hmt4-20      | 8,958.00  | 614.79         | 10,472.00 | 864.42          | 18,497.00 | 1282.37         | 14,752.00 | 1033.92         | 18,471.00 | 1432.35           | 11,969.00 | 886.55             | 15,088.00 | 1257.7             | 4,946.00   | 915.05            | 17,208.00 | 1351.65           | 14,766.00 | 1091.9           | 8,610.00  | 577.61           | 6,440.00   | 717.24          |
| Inos         | 16,009.00 | 3807.64        | 15,872.00 | 4104.56         | 9,474.00  | 2398.77         | 10,590.00 | 2969.64         | 8,044.00  | 2428.98           | 12,833.00 | 3139.54            | 9,678.00  | 3014.57            | 11,641.00  | 3200.63           | 7,115.00  | 2344.65           | 9,324.00  | 2655.11          | 12,300.00 | 3127.5           | 10,973.00  | 2929.42         |
| Lip3         | 13        | 7.72           | 7         | 21.93           | 118       | 60.55           | 95        | 44.39           | 137       | 64.05             | 17        | 19.56              | 276       | 95.53              | 20         | 13.14             | 198       | 57.03             | 661       | 182.67           | 5         | 11.21            | 13         | 11.1            |
| Lsd-1        | 20,002.00 | 4085.08        | 20,281.00 | 4287.21         | 4,902.00  | 949.69          | 6,368.00  | 1283.86         | 3,921.00  | 871.8             | 11,220.00 | 2284.48            | 4,992.00  | 1148.74            | 6,902.00   | 1976.54           | 4,327.00  | 940.52            | 3,935.00  | 901.35           | 18,816.00 | 4431.51          | 19,727.00  | 4672.81         |
| Lsp1beta     | 60,110.00 | 7157.98        | 39,870.00 | 4913.93         | 20,067.00 | 2392.72         | 24,805.00 | 3418.51         | 36,428.00 | 5874.96           | 56,131.00 | 6914.73            | 31,158.00 | 4762.36            | 41,910.00  | 6548.71           | 19,335.00 | 2987.78           | 10,448.00 | 1798.82          | 5,308.00  | 765.71           | 5,089.00   | 762.85          |
| Ocho         | 80        | 15.04          | 0         | 1               | 0         | 1.79            | 0         | 1.28            | 0         | 1                 | 0         | 3.22               | 0         | 3.22               | 0          | 1.01              | 0         | 3.2               | 0         | 1                | 73        | 9.09             | 324        | 61.78           |
| Pc           | 1,069.00  | 621.2          | 1,156.00  | 790.11          | 2,146.00  | 1348.9          | 1,907.00  | 1189.5          | 2,492.00  | 1376.64           | 1,472.00  | 869.65             | 1,928.00  | 1484.68            | 1,018.00   | 948.38            | 2,067.00  | 1482.5            | 1,871.00  | 1270.69          | 1,061.00  | 602.98           | 1,006.00   | 663.18          |
| Pgm          | 34,133.00 | 13073.04       | 36,582.00 | 15465.2         | 19,158.00 | 7342.21         | 18,739.00 | 7698.01         | 19,132.00 | 8051.87           | 29,259.00 | 11073.71           | 22,663.00 | 9993.62            | 27,164.00  | 10760.32          | 16,561.00 | 7083.24           | 16,709.00 | 7665.88          | 29,958.00 | 12126.62         | 28,133.00  | 11340.6         |
| Sap30        | 2,552.00  | 432.58         | 2,549.00  | 483.02          | 4,533.00  | 725.03          | 3,558.00  | 650.1           | 4,409.00  | 783.02            | 2,901.00  | 558.45             | 3,764.00  | 756.81             | 2,897.00   | 583.78            | 3,998.00  | 815.24            | 3,809.00  | 704.92           | 2,137.00  | 426.5            | 2,111.00   | 394.58          |
| Su(var)3-3   | 1,993.00  | 279.67         | 2,357.00  | 354.99          | 4,617.00  | 653.31          | 3,398.00  | 600.36          | 4,494.00  | 677.7             | 2,473.00  | 384.45             | 3,823.00  | 741.68             | 1,517.00   | 472.68            | 4,466.00  | 675.1             | 3,940.00  | 675.51           | 1,684.00  | 301.81           | 1,509.00   | 307.58          |
| Su(var)3-7   | 6,339.00  | 1047.89        | 6,765.00  | 1240.45         | 16,021.00 | 2356.43         | 11,350.00 | 2060.44         | 15,463.00 | 2673.56           | 7,745.00  | 1393.62            | 12,629.00 | 2394.14            | 5,162.00   | 1583.65           | 14,238.00 | 2476.43           | 12,267.00 | 2203.44          | 5,435.00  | 977.06           | 4,474.00   | 953.75          |
| Top2         | 20,821.00 | 3521.04        | 22,867.00 | 4113.52         | 40,316.00 | 6225.81         | 32,708.00 | 5699.8          | 40,332.00 | 6727.97           | 28,994.00 | 4773.1             | 36,473.00 | 6348.23            | 16,734.00  | 4606.52           | 38,882.00 | 6716.66           | 35,641.00 | 5645.11          | 20,776.00 | 3327.23          | 15,416.00  | 3112.71         |
| Tps1         | 61,525.00 | 2870.94        | 61,330.00 | 3047.2          | 18,475.00 | 880.57          | 21,305.00 | 1106.61         | 15,413.00 | 848.3             | 42,484.00 | 1940.47            | 22,999.00 | 1307.63            | 37,889.00  | 2054.3            | 14,649.00 | 775.33            | 14,419.00 | 856.65           | 65,498.00 | 3393.8           | 60,395.00  | 3250.39         |
| Ubx          | 629       | 80.97          | 726       | 81.92           | 228       | 28.58           | 265       | 20.16           | 155       | 21.4              | 436       | 53.37              | 146       | 25.92              | 327        | 51.52             | 182       | 25.47             | 178       | 20.35            | 615       | 72.5             | 516        | 82.9            |
| asf1         | 4,781.00  | 1478.24        | 4,780.00  | 1614.7          | 8,113.00  | 2617.38         | 6,442.00  | 2261.92         | 8,207.00  | 2953.84           | 4,623.00  | 1696.87            | 7,488.00  | 3052.4             | 6,288.00   | 2059.35           | 7,780.00  | 3080.59           | 7,194.00  | 2703.34          | 3,524.00  | 1235.96          | 3,942.00   | 1284.85         |
| fd68A (Mnf)  | 5,141.00  | 1047.89        | 5,048.00  | 1029.16         | 7,302.00  | 1310.02         | 6,409.00  | 1257.08         | 7,056.00  | 1343.56           | 5,460.00  | 1114.24            | 5,030.00  | 1129.07            | 2,845.00   | 1095.83           | 6,350.00  | 1258.84           | 5,308.00  | 1214.23          | 5,111.00  | 951.7            | 4,148.00   | 1006.96         |
| Rpl32        | 99,904.00 | 58305.82       | 91,732.00 | 59366.92        | 78,861.00 | 46639.15        | 79,128.00 | 48603.18        | 68,666.00 | 45474.61          | 92,460.00 | 54833.92           | 81,046.00 | 54113.59           | 127,888.00 | 55754.86          | 70,315.00 | 48535.18          | 67,856.00 | 50318.55         | 97,337.00 | 64199.1          | 104,658.00 | 60675.82        |
| Pearson's r  |           | <b>0.81542</b> |           | <b>0.818897</b> |           | <b>0.875623</b> |           | <b>0.903698</b> |           | <b>0.82656592</b> |           | <b>0.843696342</b> |           | <b>0.884495098</b> |            | <b>0.95002575</b> |           | <b>0.85906948</b> |           | <b>0.8717497</b> |           | <b>0.8415195</b> |            | <b>0.883143</b> |

**Supplementary file 4** - Transcriptomic data was validated by Nanostring: 100ng total RNA in 5uL total volume was processed using the standard nCounter XT Total RNA protocol. The Codeset consists of Reporter and Capture probes that hybridise the target sequence of interest, forming a tripartite complex. Hybridised samples were processed in batches of 12 using the High Sensitivity Protocol (3 hours). Raw data was exported and QC-checked using Nanostring's nSolver data analysis tool (www.nanostring.com). As per the Nanostring CodeSet design criteria, 25 candidate genes for validation were chosen, with two housekeeping genes incorporated within this amount (Mnf and Rpl32). Raw data was normalised to the geometric mean of both the positive controls (included in the hybridisation steps) and the nominated housekeeping genes. Normalised Nanostring data (expression level) was compared to transcriptomic data (mean expression level) and the Pearson's correlation coefficient was calculated in R
